# Supplementary material for: Gold nanoclusters as prospective carriers and detectors of pramipexole
Source: Royal Society of Chemistry journal article supplement (doi:10.1039/d1ra02172a), 2021-01-01
Supplement: d1ra02172a1.pdf [file d1ra02172a1.pdf]

## Supplementary Information

### Gold nanoclusters as prospective carriers and detectors of pramipexole

**Nguyen Thanh Si,<sup>1,2,\*</sup> Nguyen Thi Ai Nhung,<sup>3</sup> Thanh Q. Bui,<sup>3</sup>**

**Minh Tho Nguyen<sup>4</sup> and Pham Vu Nhat<sup>5,\*</sup>**

<sup>1</sup> *Computational Chemistry Research group, Ton Duc Thang University, Ho Chi Minh City, Vietnam*

<sup>2</sup> *Faculty of Applied Sciences, Ton Duc Thang University, Ho Chi Minh City, Vietnam*

<sup>3</sup> *Department of Chemistry, University of Sciences, Hue University, Hue, Vietnam*

<sup>4</sup> *Institute for Computational Science and Technology (ICST), Ho Chi Minh City, Vietnam*

<sup>5</sup> *Department of Chemistry, Can Tho University, Can Tho, Viet Nam*

Emails: [nguyenthanhsi@tdtu.edu.vn](mailto:nguyenthanhsi@tdtu.edu.vn); [nhat@ctu.edu.vn](mailto:nhat@ctu.edu.vn)

**Table S1.** Some basic properties of PPX tautomers including energies (eV) of frontier orbitals, HOMO–LUMO gap ( $E_g$ ) and proton affinities (PA, kcal/mol) (PBE/cc-pVTZ + ZPE).

|                     | <b>HOMO</b> | <b>LUMO</b> | <b><math>E_g</math></b> | <b>PA, kcal/mol</b> |
|---------------------|-------------|-------------|-------------------------|---------------------|
| <b>PPX</b>          | -4.66       | -0.87       | 3.79                    |                     |
| N (thiazole)        |             |             |                         | 230.5               |
| N (side chain)      |             |             |                         | 229.3               |
| N (amine)           |             |             |                         | 205.1               |
| S (thiazole)        |             |             |                         | 192.8               |
| <b><i>t</i>-PPX</b> | -4.55       | -0.79       | 3.76                    |                     |
| N (thiazole)        |             |             |                         | 232.5               |
| N (side chain)      |             |             |                         | 232.9               |
| N (amine)           |             |             |                         | 206.8               |
| S (thiazole)        |             |             |                         | 194.8               |

**Table S2.** Binding energy  $E_b$ , enthalpy  $\Delta H^\circ$ , Gibbs energy  $\Delta G^\circ$  (in kcal.mol<sup>-1</sup>) for the *t*-PPX binding to Au<sub>N</sub> ( $N = 6, 8, 20$ ) clusters (PBE/cc-pVDZ-PP/cc-pVTZ).

| Complex                               | In gas phase |                  |                  | In water |                  |                  |
|---------------------------------------|--------------|------------------|------------------|----------|------------------|------------------|
|                                       | $E_b$        | $\Delta H^\circ$ | $\Delta G^\circ$ | $E_b$    | $\Delta H^\circ$ | $\Delta G^\circ$ |
| <b>Au<sub>6</sub>-<i>t</i>-PPX_1</b>  | -24.94       | -23.54           | -14.77           | -21.86   | -20.47           | -11.93           |
| <b>Au<sub>6</sub>-<i>t</i>-PPX_2</b>  | -21.94       | -20.26           | -8.65            | -20.02   | -18.03           | -7.29            |
| <b>Au<sub>6</sub>-<i>t</i>-PPX_3</b>  | -16.91       | -15.68           | -7.77            | -13.72   | -12.58           | -3.98            |
| <b>Au<sub>6</sub>-<i>t</i>-PPX_4</b>  | -13.79       | -12.08           | -3.96            | -12.06   | -10.26           | -0.78            |
| <b>Au<sub>8</sub>-<i>t</i>-PPX_1</b>  | -31.30       | -29.51           | -15.65           | -30.42   | -27.89           | -13.61           |
| <b>Au<sub>8</sub>-<i>t</i>-PPX_2</b>  | -30.63       | -29.03           | -15.73           | -23.40   | -21.41           | -10.50           |
| <b>Au<sub>8</sub>-<i>t</i>-PPX_3</b>  | -29.19       | -27.03           | -12.90           | -30.43   | -27.90           | -13.63           |
| <b>Au<sub>8</sub>-<i>t</i>-PPX_4</b>  | -20.59       | -19.87           | -9.30            | -18.42   | -17.80           | -6.26            |
| <b>Au<sub>20</sub>-<i>t</i>-PPX_1</b> | -23.22       | -21.86           | -13.96           | -18.91   | -17.51           | -9.45            |
| <b>Au<sub>20</sub>-<i>t</i>-PPX_2</b> | -22.54       | -20.78           | -9.22            | -19.78   | -17.91           | -8.72            |
| <b>Au<sub>20</sub>-<i>t</i>-PPX_3</b> | -15.29       | -14.55           | -5.72            | -13.58   | -12.80           | -3.28            |
| <b>Au<sub>20</sub>-<i>t</i>-PPX_4</b> | -13.18       | -11.95           | -2.39            | -11.66   | -10.33           | -0.08            |

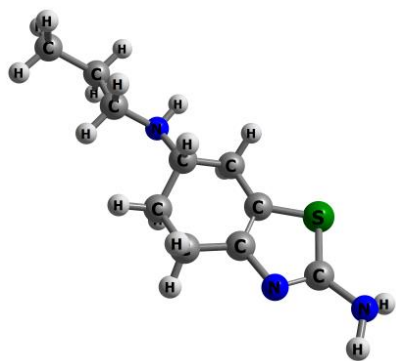

PPX (0.0)

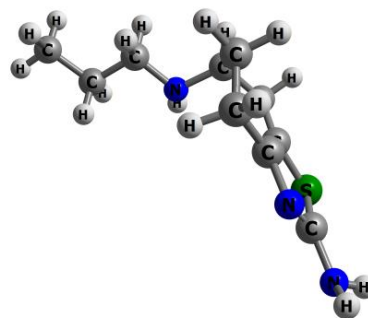

*t*-PPX (1.2 kcal/mol)

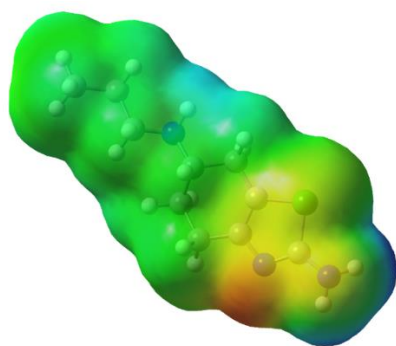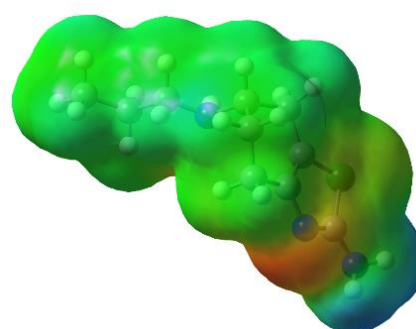

**Figure S1.** Optimized structures and molecular electrostatic maps of PPX tautomers.

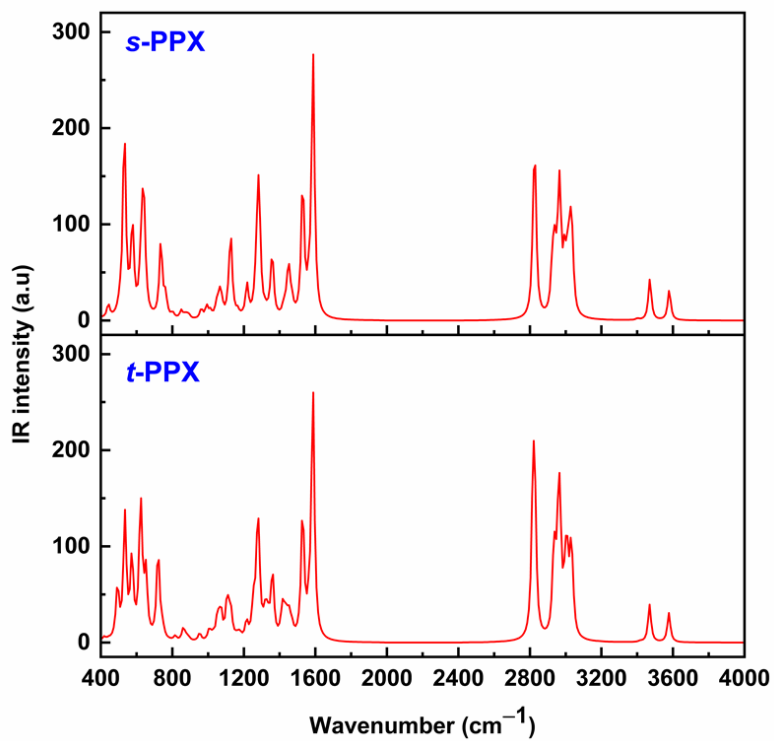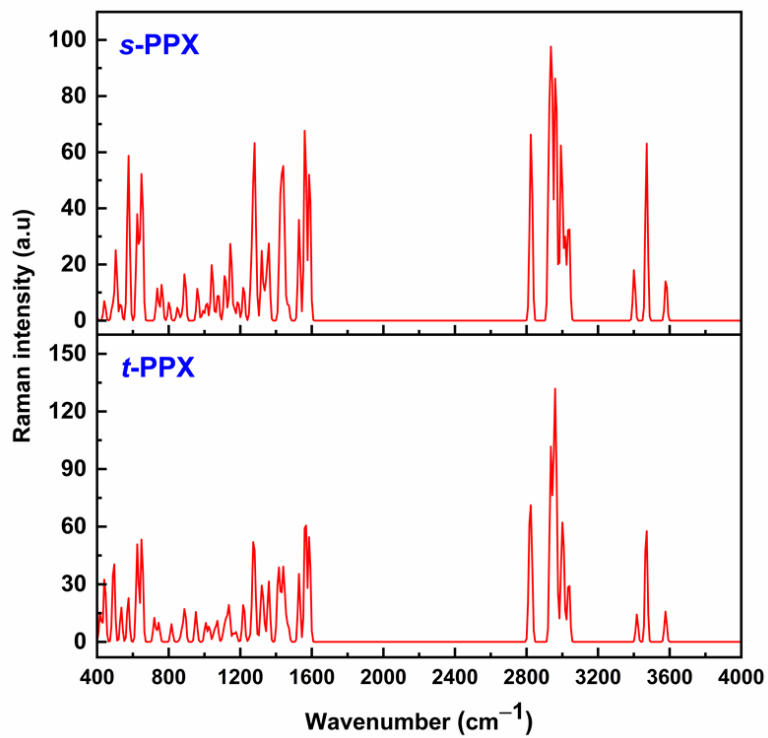

**Figure S2.** IR and Raman spectra of **PPX** and *t*-**PPX** tautomers in gas-phase
